# Supplementary material
Source: publisher site journal article supplement (https://www.dovepress.com/get_supplementary_file.php?f=336541.xlsx)
Supplement: Supplementary file 1 [file get_supplementary_file.php]

## Sheet: Sheet1
	Supplementary data. Minimum, Maximum, Average, and laterality of bilateral grip strength (kg) according to sex and age
		age (y)	Min						Max						Ave						Lat
			CTRL			DCM			CTRL			DCM			CTRL			DCM			CTRL			DCM
	Male	40-59	42.6	±	7.6	23.3	±	12.1	46.9	±	6.7	30.2	±	11.5	44.8	±	6.6	26.8	±	11.2	4.3	±	5.5	6.9	±	7.3
		60-69	35.4	±	7.7	16.5	±	9.1	38.9	±	6.7	23.6	±	10.3	37.2	±	7.1	20.1	±	6.4	3.5	±	2.9	7.1	±	10.5
		70-79	29.9	±	7.6	16.5	±	8	33.7	±	6.6	22	±	7.2	31.8	±	6.8	19.3	±	7.3	3.8	±	3.9	5.4	±	3.8
		80-89	25.9	±	5.6	10.8	±	6.6	30	±	6.4	14.3	±	6.1	27.9	±	5.6	12.6	±	6.1	4	±	4.2	3.5	±	3.1
	Female	40-59	25.5	±	6.8	14.5	±	7.4	28.1	±	6.9	19.5	±	7.8	26.8	±	6.8	17	±	7.3	2.6	±	1.9	5	±	4.4
		60-69	20.3	±	4.6	10.4	±	6	23	±	4.6	14.5	±	5.9	21.6	±	4.5	12.5	±	5.6	2.7	±	2.3	4.1	±	4.2
		70-79	17.7	±	4.8	8.5	±	4.9	20.5	±	4.9	11.6	±	4.7	19.1	±	4.7	10.1	±	5.1	2.9	±	2.3	3	±	5.5
		80-89	15.2	±	3.8	4.4	±	4	17.7	±	3.8	8.2	±	5	16.4	±	3.7	6.3	±	4	2.5	±	1.6	3.7	±	4.1
	DCM, degenerative cervical myelopathy; CTRL, control
	Min, minimum grip strength (kg) of the two hands
	Max, maximum grip strength (kg) of the two hands
	Ave, average grip strength (kg) of the two hands
	Lat, laterality of grip strength (kg) between the two hands
